# Supplementary material for: Thermosensitive antibacterial Ag nanocomposite hydrogels made by a one-step green synthesis strategy
Source: Royal Society of Chemistry journal article supplement (doi:10.1039/c5nj03608a), 2016-01-01
Supplement: c5nj03608a1.pdf [file c5nj03608a1.pdf]

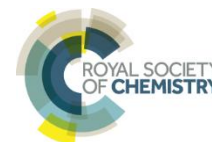

## Journal Name

### ARTICLE

## Supporting information for publication

# Thermosensitive antibacterial Ag nanocomposite hydrogels made by one-step green synthesis strategy

Haoyang Jiang, Gongzheng Zhang, Bo Xu, Xianqi Feng, Quanming Bai, Guoli Yang, Huanjun Li\*

School of Chemical Engineering and Environment, Beijing Institute of Technology, Beijing 100081, P. R. China

E-mail: lihj@bit.edu.cn.

## Experimental section

### Materials.

N-isopropylacrylamide (NIPAm) was available from Tokyo Chemical Industry Co., Ltd and purified by recrystallization from n-hexane and toluene mixture followed by drying under vacuum at 40 °C. N-(hydroxymethyl) acrylamide (HMAM) was purchased by Aladdin Industrial Corporation and used without further purification. Synthetic laponite clay ( $[\text{Mg}_{5.34}\text{Li}_{0.66}\text{Si}_8\text{O}_{20}(\text{OH})_4]\text{Na}_{0.66}$ , layer size, 20-30 nm  $\times$  1 nm; cation-exchange capacity, 104 mequiv/100 g) was provided by Rockwood Ltd, USA and used as received. Potassium peroxydisulfate (KPS, initiator) was purchased from Tianjin Kermel Chemical Reagent Co., Ltd. Silver Nitrate ( $\text{AgNO}_3$ ) was used from Tianjin Chemical Technology Development Co. Ltd. The water used for all experiments was obtained from a Millipore direct-Q5 purification system.

### Characterization.

The UV-Vis absorption spectrum of AgNPs was performed on Varian 95011211 ultraviolet spectrophotometer. The size and morphology of the as-prepared AgNPs and Ag-NC gels were examined by transmission electron microscopy (TEM, JEOL JEM-2100F) operating at 200 kV. The morphology of freeze-dried Ag-NC gels was observed by scanning electron microscopy (SEM, quanta 250 FEI Co., USA). The crystalline phase for both AgNPs and Ag-NC gel was determined by powder X-ray diffraction (XRD) pattern (Rikagu diffractometer, Cu radiation,  $\lambda = 0.1546$  nm). Silver release from hydrogel was analyzed by Inductively Coupled Plasma-Mass Spectrometry (ICP-MS) using a Metrohm (Switzerland), 761 Compact IC. Specimens were prepared by immersing the Ag-NC gel (2.5 g) in 100 mL of deionized water at 37 °C for 10 days. The deionized water was replaced after 2, 4, 6, 8, 10 days and analyzed the silver content.

**Tab. S1** Compositions in the reaction solution for Ag-NC gels with different monomer ratios.

| Hydrogels <sup>a)</sup> | HMAM/g | NIPAm/g | $\text{AgNO}_3/\text{ml}$ <sup>b)</sup> | $\text{H}_2\text{O}/\text{g}$ | Clay/g | KPS/g |
|-------------------------|--------|---------|-----------------------------------------|-------------------------------|--------|-------|
| Ag0-NC50                | 0.505  | 0.565   | 0                                       | 10                            | 0.32   | 0.01  |
| Ag1-NC50                | 0.505  | 0.565   | 0.1                                     | 10                            | 0.32   | 0.01  |
| Ag5-NC50                | 0.505  | 0.565   | 0.5                                     | 10                            | 0.32   | 0.01  |
| Ag10-NC50               | 0.505  | 0.565   | 1.0                                     | 10                            | 0.32   | 0.01  |
| Ag5-NC70                | 0.303  | 0.791   | 0.5                                     | 10                            | 0.32   | 0.01  |
| Ag5-NC80                | 0.202  | 0.904   | 0.5                                     | 10                            | 0.32   | 0.01  |
| Ag5-NC90                | 0.101  | 1.017   | 0.5                                     | 10                            | 0.32   | 0.01  |

a) Ag0, Ag1, Ag5, Ag10 in the Ag-NC gel stand for the amount of  $\text{AgNO}_3$  solution of 0, 1.0 mmol, 5.0 mmol, 10.0 mmol, respectively; NC50, NC70, NC80, NC90 represent the NIPAm of 50 mol%, 70 mol%, 80 mol%, 90 mol%, respectively. b) The concentration of  $\text{AgNO}_3$  is 100 mM.

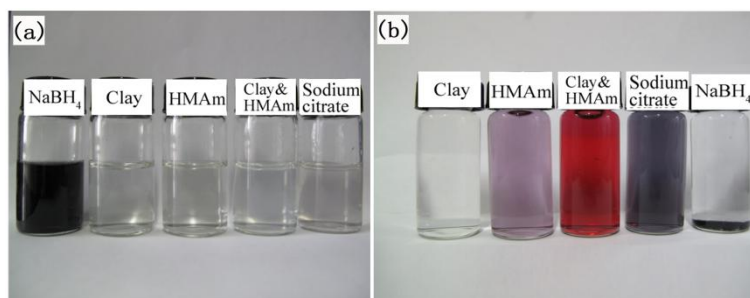

**Fig. S1.** The visual colour change of solution under different reduction conditions ( $\text{NaBH}_4$ , Clay, HMAM, Clay&HMAM and Sodium citrate) (a) before reduction and (b) 5h after reduction.

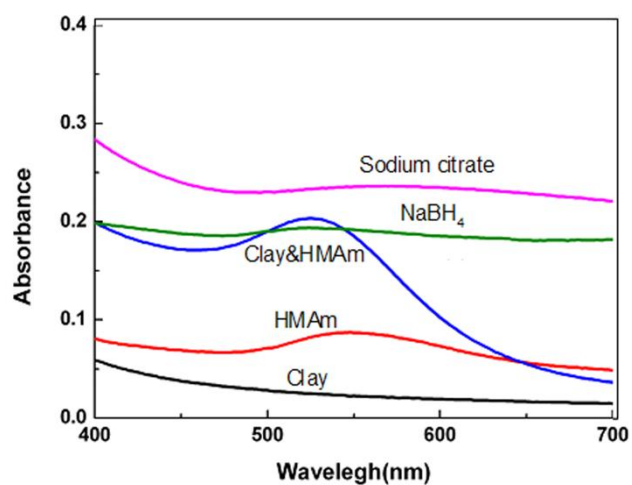

**Fig. S2.** The UV-VIS spectra of Au NPs under different reduction conditions (clay, HMAM, clay&HMAM,  $\text{NaBH}_4$  and sodium citrate, respectively)

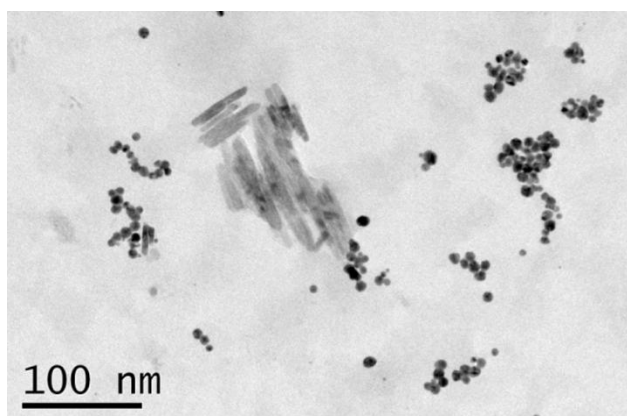

**Fig. S3.** The TEM image of Au NPs generated from Clay/HMAM/HAuCl
